# Supplementary material for: Ni-Based metal–organic framework derived Ni@C nanosheets on a Ni foam substrate as a supersensitive non-enzymatic glucose sensor
Source: Royal Society of Chemistry journal article supplement (doi:10.1039/c7tb01363a), 2017-01-01
Supplement: c7tb01363a1.pdf [file c7tb01363a1.pdf]

**Ni-based metal-organic framework derived Ni@C nanosheets on Ni foam substrate as a supersensitive non-enzymatic glucose sensor**

Li Zhang, Yaru Ding, Ranran Li, Chen Ye, Guangyu Zhao, Yan Wang\*

*School of Chemistry and Chemical Engineering, Harbin Institute of Technology,*

*Harbin, Heilongjiang, 150080, PR China*

Corresponding author: wangy\_msn@hit.edu.cn, +86 451 86403719

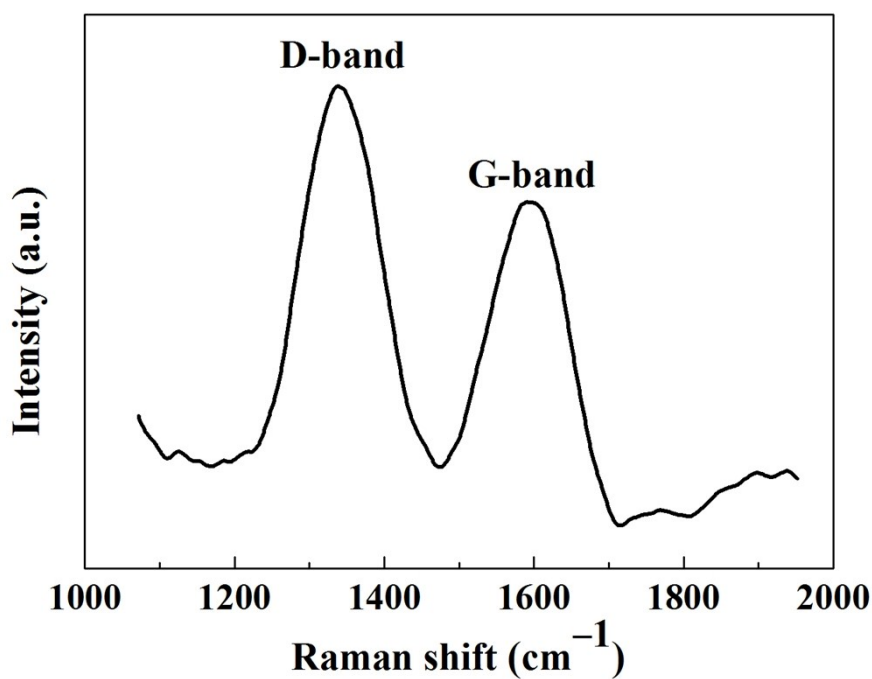

Fig. S1 Raman spectra of the prepared Ni@C powder sample

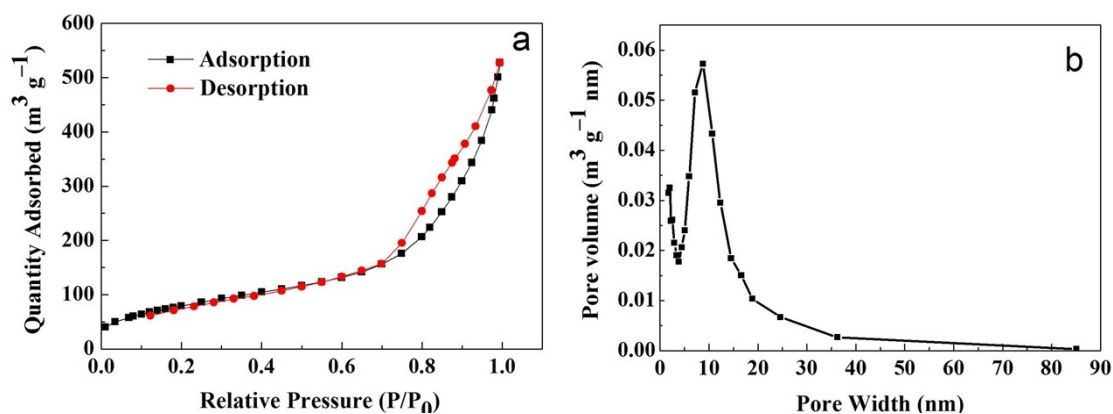

Fig. S2 (a)  $\text{N}_2$  adsorption and desorption isotherms of  $\text{Ni@C}$  powder; (b) Pore size distributions of  $\text{Ni@C}$  powder.

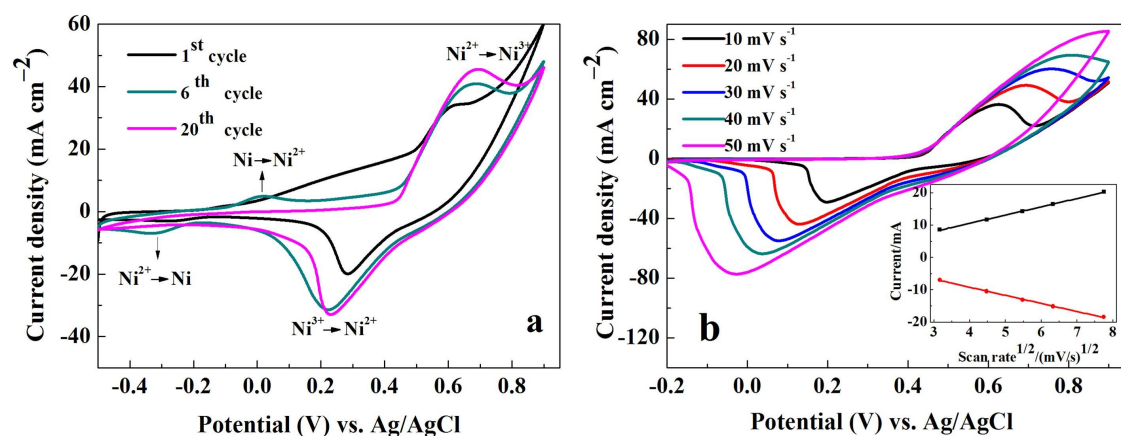

Fig. S3 Cyclic voltammograms (CV) (a) at different cycles with a scan rate of  $20 \text{ mV s}^{-1}$  in the absence of glucose; (b) at different scanning rate ranging from  $10 \text{ mV s}^{-1}$  to  $60 \text{ mV s}^{-1}$  with addition of  $0.2 \text{ mM}$  glucose (Inset: linear plots of peak currents versus the square root of the scan rates);

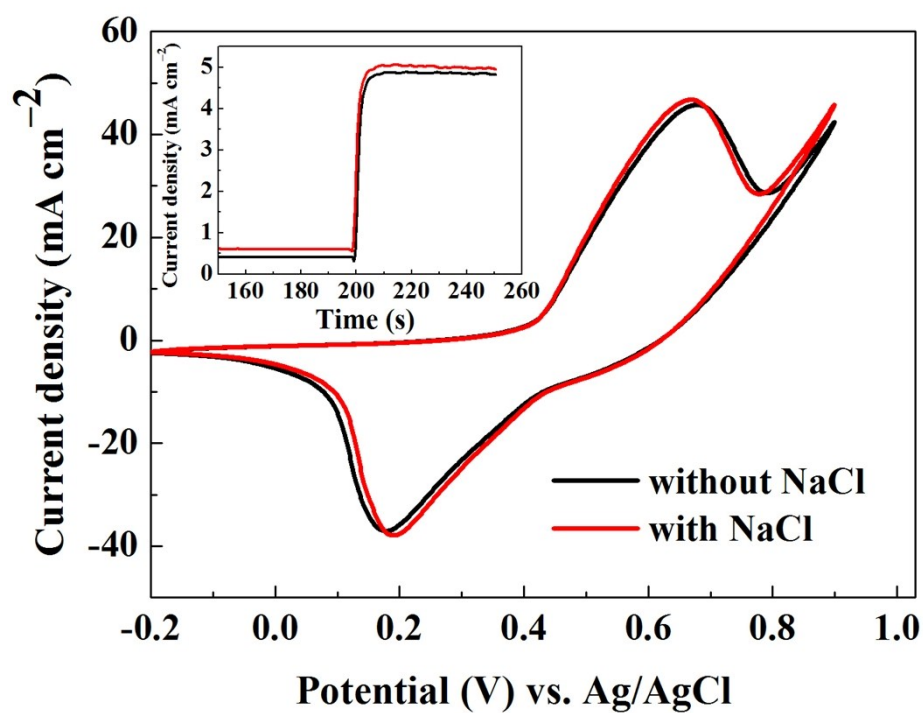

Fig. S4 CVs of the Ni@C/Ni foam electrodes containing 0.2 mM glucose with and without 20 mM NaCl in 0.1 M NaOH solution, the inset is the corresponding amperometric responses.

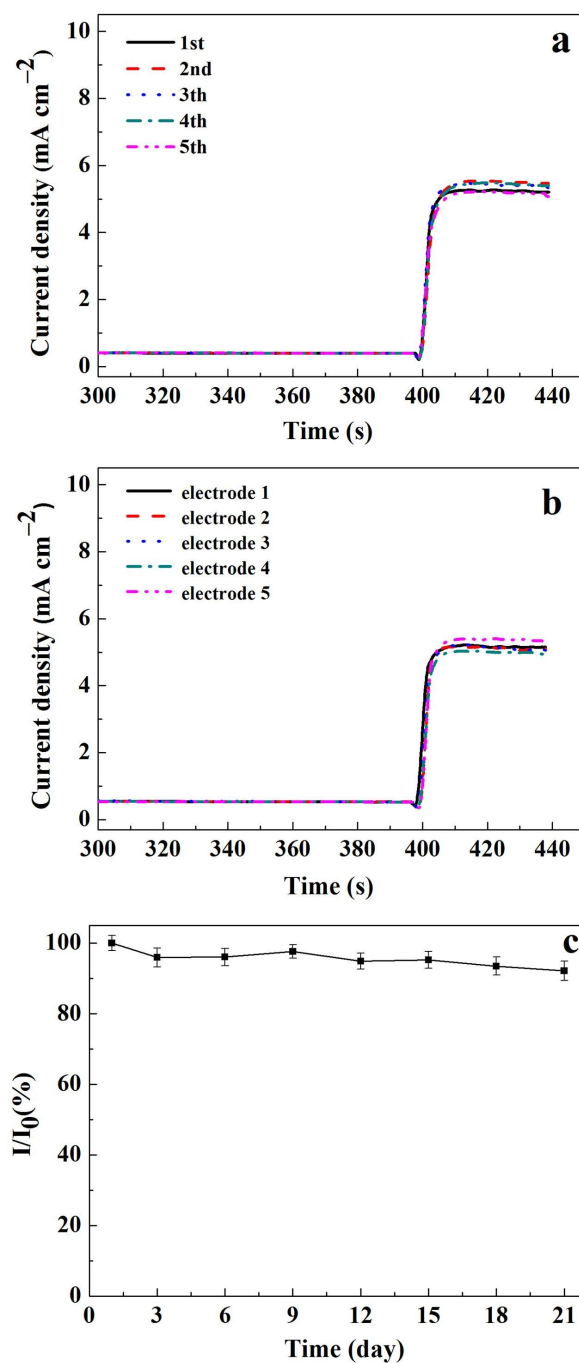

Fig. S5 (a) Amperometric responses of an electrode to the addition of 0.1 mM glucose solution for respective five times; (b) Amperometric responses of five electrodes fabricated on the same condition to the addition of 0.1 mM glucose solution; (c) long-term stability test of Ni@C/Ni foam electrodes stored at room temperature over a 21-day period.
